# Supplementary material
Source: PubMed Central journal article supplement (PMC3719772)
Supplement: AAC.00211-13_zac008132020so1.pdf [file AAC.00211-13_zac008132020so1.pdf]

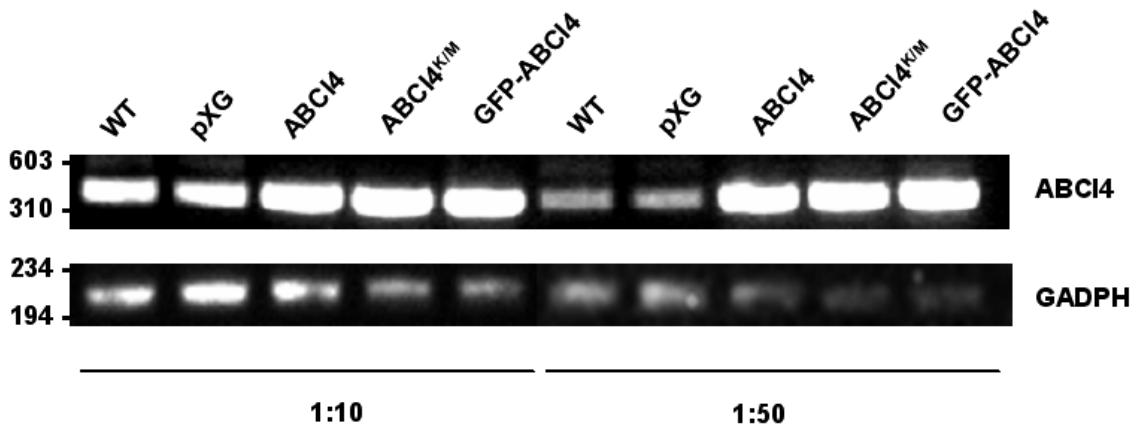

**Figure S1. Gene-expression analysis of *ABCI4* in *Leishmania* lines.**

Upper panel: gene expression of *ABCI4* by RT-PCR as indicated by the amplified 525-bp *ABCI4* fragment. Lower panel: gene expression of *GADPH* as internal loading control showing the amplified 227-bp *GADPH* fragment. Total RNA was extracted from WT, pXG (control), *ABCI4*, *ABCI4*<sup>K/M</sup> and GFP-*ABCI4* parasites, and then reverse-transcribed by specific priming to single-stranded cDNA. The cDNA was amplified by PCR as described in the Materials and Methods section at 1:10 and 1:50 dilutions. PCR products were electrophoresed on a 1% agarose gel, stained with ethidium bromide, visualized under a UV illuminator and the relative intensity against *GADPH* was measured using a densitometer. The positions of molecular markers (bp) are indicated on the left.

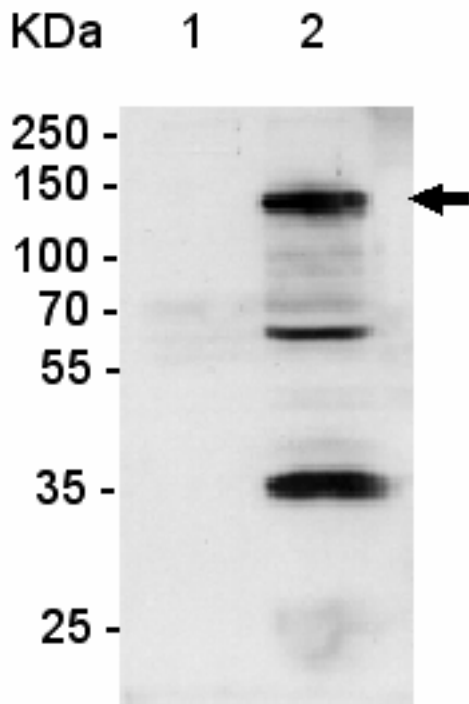

**Figure S2. Protein expression in GFP-ABCI4 *Leishmania* parasites.**

Immunodetection of GFP in *L. major* lines expressing control pXG (lane 1) and GFP-ABCI4 (lane 2). Western blot analysis of total proteins from parasites incubated with antibody against GFP, at a 1:5000 dilution. The molecular mass standards (kDa) from Bio-Rad are indicated on the left. A band corresponding to GFP-ABCI4, indicated by an arrow, was observed at around 130 kDa. Fragments below the band of GFP-ABCI4 correspond to a natural protein-degradation process.

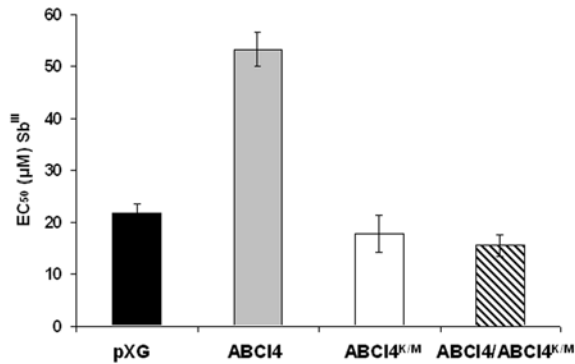

**Figure S3. Sensitivity to antimony in *L. major* lines.** *L. major* lines pXG (black histogram), ABCI4 (grey histogram), ABCI4<sup>K/M</sup> (white histogram) and ABCI4 coexpressing ABCI4<sup>K/M</sup> (stripes histogram) were assayed for Sb<sup>III</sup> sensitivity by determination of % cell viability using an MTT-based assay, as described in the Materials and Methods section. Data are the means  $\pm$  SD of three independent experiments.
